# Supplementary material for: Integrated pipeline for ultrasensitive protein detection in cancer nanomedicine
Source: PubMed Central journal article supplement — RSC Adv. 2023 May 15;13(21):14685–97. doi: 10.1039/d3ra02092d (PMC10183811; doi:10.1039/d3ra02092d), 2023-05-15
Supplement: RA-013-D3RA02092D-s001.pdf [file RA-013-D3RA02092D-s001.pdf]

# Supporting Information

for

## Integrated Pipeline for Ultrasensitive Protein Detection in Cancer Nanomedicine

*Chi-An Cheng,<sup>a,\*</sup> Li-Chiao Chiang,<sup>a</sup> Yu-Syuan Chu<sup>a</sup>*

<sup>a</sup> School of Pharmacy, College of Medicine, National Taiwan University, Taipei, 10050, Taiwan

\* Corresponding author: [cacheng123@ntu.edu.tw](mailto:cacheng123@ntu.edu.tw)

# Table of Contents

## **I. Supporting scheme .....S3**

**Scheme S1:** Synthesis of ultrasound-responsive PEGylated mesoporous silica nanoparticles (MSN-PEG)

## **II. Supporting figures.....S4**

**Figure S1:** Size distribution of  $95.4 \pm 10.1$  nm mesoporous silica nanoparticle (MSN) calculated from TEM images

**Figure S2:** TEM image of MSN-PEG after ultrasound treatment and heating at 50 °C for 30 min

**Figure S3:** Fluorescence microscope images of OVCAR-3 cells after 4 h treatment of 75 µg/mL TOP-MSN-PEG with and without an additional 20 h of incubation.

**Figure S4:** Cytotoxicity of the cells incubated with the supernatant obtained from ultrasound-stimulated TOP-loaded MSN-PEG solution

## **III. Supporting tables .....S8**

**Table S1:** N<sub>2</sub> adsorption/desorption characterization

**Table S2:** Summary of temperature increase of the cell supernatant and the cell viability post ultrasound treatments with various ultrasound parameters (power densities and stimulation durations)

## I. Supporting scheme

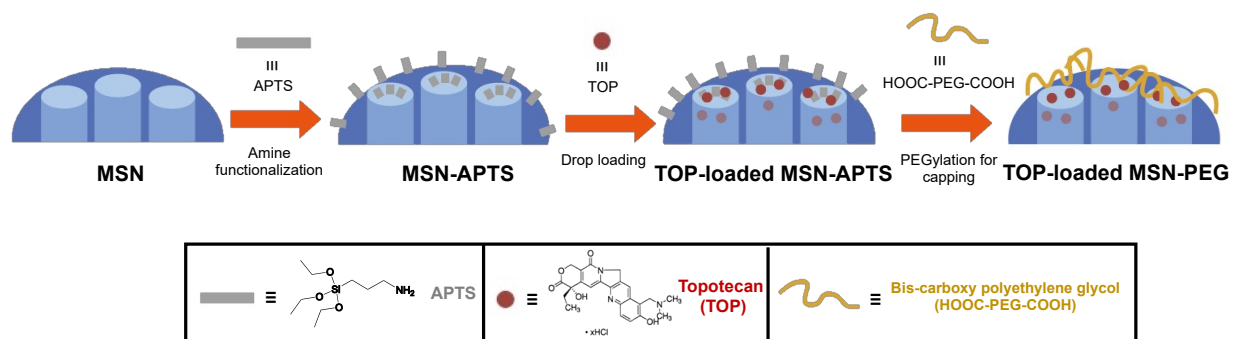

**Scheme S1:** Synthesis of ultrasound-responsive PEGylated mesoporous silica nanoparticles (MSN-PEG)

## II. Supporting figures

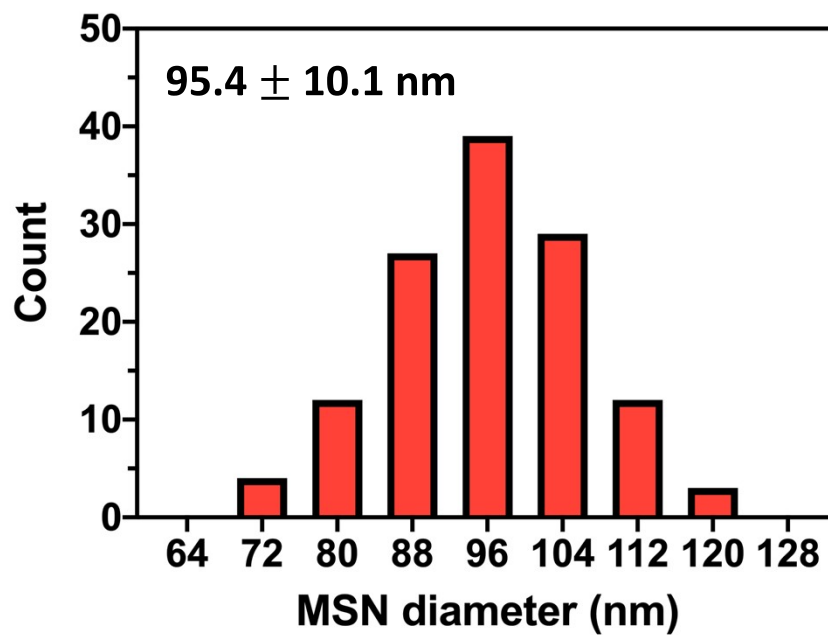

**Figure S1.** Size distribution of  $95.4 \pm 10.1$  nm mesoporous silica nanoparticle (MSN) calculated from TEM images.

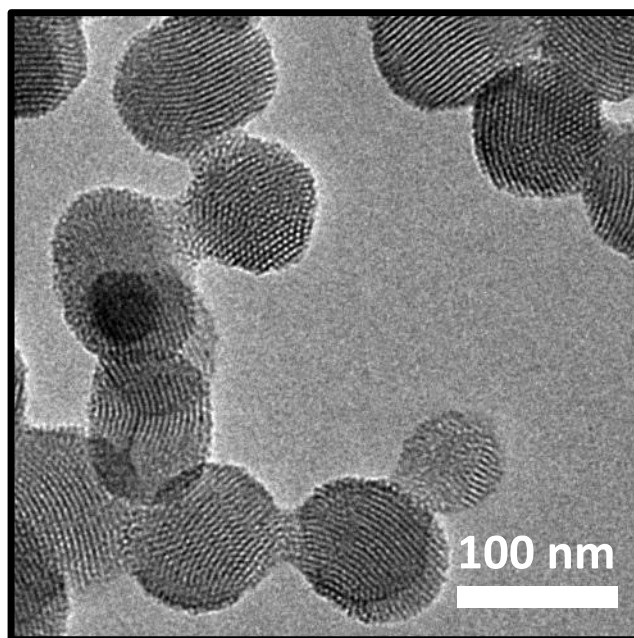

**Figure S2.** TEM image of MSN-PEG after ultrasound treatment and heating at 50 °C for 30 min.

## 75 $\mu\text{g/mL}$ TOP-MSN-PEG

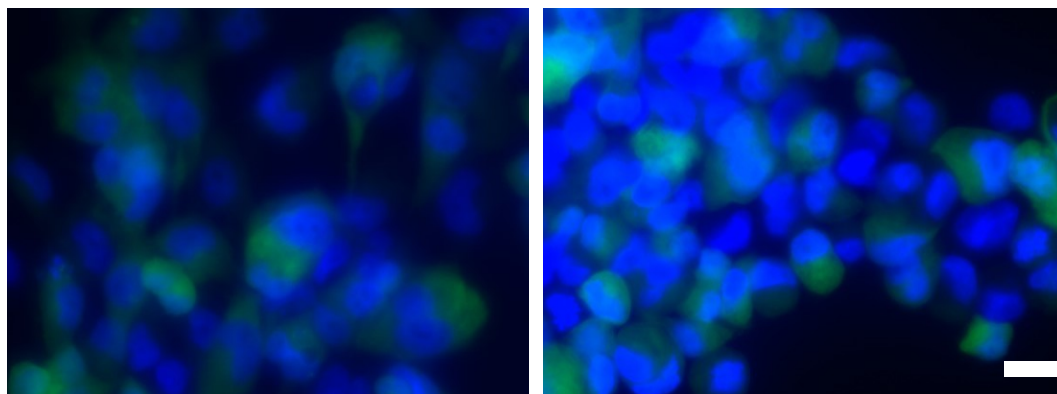

4 h

4 h + O/N

**Figure S3.** Fluorescence microscope images of OVCAR-3 cells after 4 h treatment of 75  $\mu\text{g/mL}$  TOP-MSN-PEG with and without an additional 20 h of incubation. In the merged images, the blue fluorescence was emitted from Hoechst 33342, which stained the cell nucleus, and the green fluorescence was emitted from TOP molecules carried by TOP-MSN-PEG. The scale bar is 20  $\mu\text{m}$ .

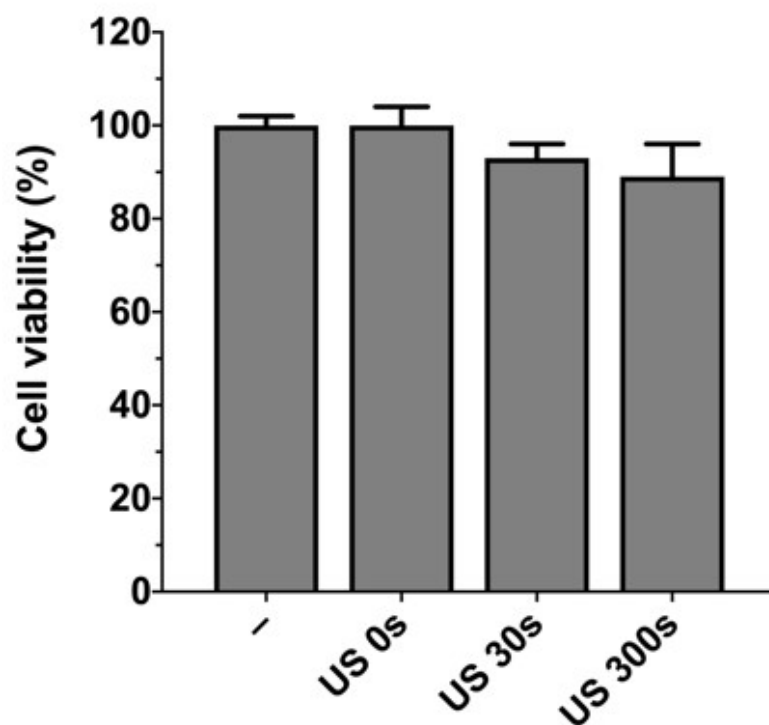

**Figure S3-S4.** Cytotoxicity of the cells incubated with the supernatant obtained from ultrasound-stimulated TOP-loaded MSN-PEG solution. Cell viability was determined by a CCK-8 assay and normalized to the cells without any treatment (control). Data are displayed as the mean (color bar)  $\pm$  standard deviation (SD) (black brackets) of three independent experiments.

### III. Supporting tables

|                                               | MSN  | MSN-PEG |
|-----------------------------------------------|------|---------|
| <b>BET surface area<br/>(m<sup>2</sup>/g)</b> | 1123 | 142     |
| <b>Pore volume<br/>(cc/g)</b>                 | 1.21 | 0.32    |
| <b>Average pore<br/>diameter (nm)</b>         | 2.4  | N/A     |

**Table S1.** Brunauer-Emmett-Teller (BET) surface area, total pore volume, and average pore diameter of MSNs and MSNs-PEG analyzed from the N<sub>2</sub> adsorption/desorption isotherms.

| <b>Ultrasound parameters<br/>(power density; stimulation duration)</b> | <b>Temperature<br/>increase (°C)</b> | <b>Cell viability<br/>(%)</b> |
|------------------------------------------------------------------------|--------------------------------------|-------------------------------|
| 0 W/cm <sup>2</sup> ; 0s                                               | 0                                    | 100                           |
| 37.5 W/cm <sup>2</sup> ; 15s                                           | 0                                    | 100                           |
| 56.3 W/cm <sup>2</sup> ; 15s                                           | 0                                    | 99                            |
| 56.3 W/cm <sup>2</sup> ; 30s                                           | 1                                    | N/A                           |
| 56.3 W/cm <sup>2</sup> ; 60s                                           | 2                                    | N/A                           |
| 75 W/cm <sup>2</sup> ; 15s                                             | 1                                    | 93                            |
| 75 W/cm <sup>2</sup> ; 30s                                             | 2                                    | 90                            |
| 75 W/cm <sup>2</sup> ; 60s                                             | 5                                    | 72                            |
| 75 W/cm <sup>2</sup> ; 120s                                            | 10                                   | 59                            |

**Table S2.** Summary of the temperature increase of the cell supernatant and the cell viability post ultrasound treatments with various ultrasound parameters (power densities and stimulation durations). The initial temperature of the solution was 22°C.
